# Supplementary material for: Bioassay-Guided Isolation of Two Eudesmane Sesquiterpenes from Lindera strychnifolia Using Centrifugal Partition Chromatography
Source: MDPI journal article supplement (doi:10.3390/molecules26175269), 2021-08-30
Supplement: s1 [file s1]

Supplementary Material

# Bioassay-Guided Isolation of Two Eudesmane Sesquiterpenes from *Lindera strychnifolia* Using Centrifugal Partition Chromatography

Ji Hoon Kim <sup>1,†</sup>, Je-Seung Jeon <sup>1,†</sup>, Jung Hoon Kim <sup>1</sup>, Eun Ju Jung <sup>1</sup>, Yun Jung Lee <sup>1</sup>, En Mei Gao <sup>1</sup>,  
Ahmed Shah Syed <sup>2</sup>, Rak Ho Son <sup>1,3</sup> and Chul Young Kim <sup>1,\*</sup>

<sup>1</sup> College of Pharmacy and Institute of Pharmaceutical Science and Technology, Hanyang University, Ansan 15588, Korea; gg890718@gmail.com (J.H.K.); jsjeoncy@gmail.com (J.-S.J.); evveje@naver.com (J.H.K.); jejs2@naver.com (E.J.J.); sopihya@naver.com (Y.J.L.); rhdmsal@hanyang.ac.kr (E.M.G.); sonnaco@huons.com (R.H.S.)

<sup>2</sup> Department of Pharmacognosy, Faculty of Pharmacy, University of Sindh, Jamshoro 76080, Pakistan; shahahmed454@gmail.com

<sup>3</sup> R&D Center, Huons Co. Ltd., Ansan 15588, Korea

\* Correspondence: chulykim@hanyang.ac.kr; Tel.: +82-31-400-5809

† These authors contributed equally to this work.

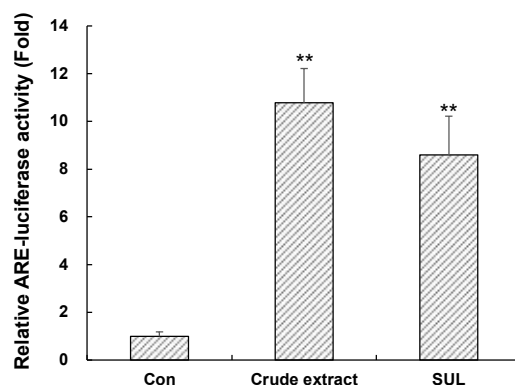

**Figure S1.** The relative ARE-luciferase activity of *Lindera strychnifolia* extract. ARE induction activity was evaluated in ARE-HepG2 cells at concentration of 30  $\mu$ g/mL. Sulforaphane (SUL, 5 $\mu$ M) was used as positive control. Data are presented as means  $\pm$  S.E. (n = 3). \*\*, P < 0.01 (compared with the vehicle-treated control).

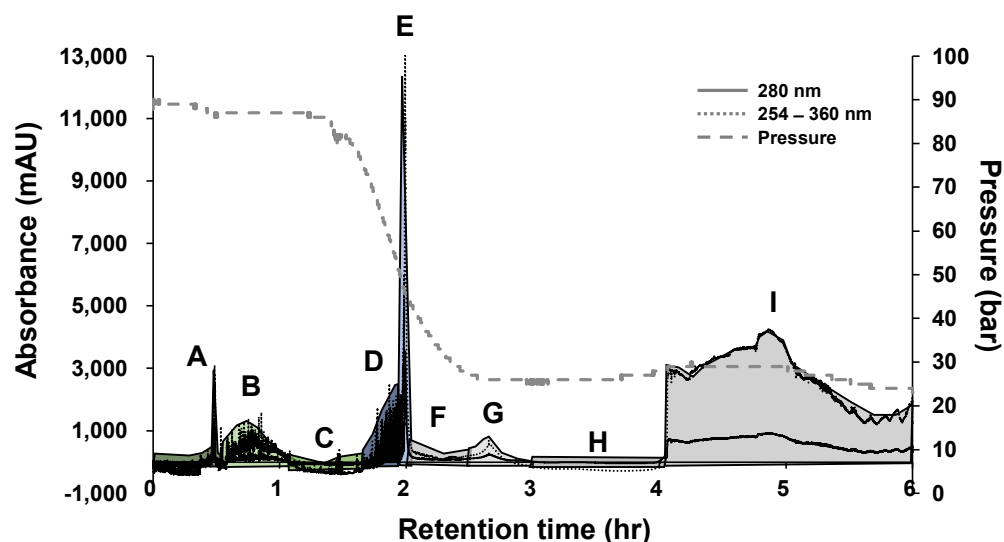

**Figure S2.** CPC chromatogram of crude *L. strychnifolia* extract. CPC operation condition was as follows; The lower layer of n-hexane–acetonitrile–water (10:2:8, v/v/v) was used as the stationary phase and upper layer of A (n-hexane–acetonitrile–water, 10:2:8, v/v/v), B (upper layer of ethyl acetate–acetonitrile–water, 10:2:8, v/v/v), and C (upper layer of water-saturated *n*-butanol–acetonitrile–water, 10:2:8, v/v/v) were subsequently eluted as mobile phase with a flow rate of 10 mL/min. Step gradient elution of mobile phase was as follows: 0–120 min (100% A), 120–180 min (100% A–100% B), 180–240 min (100% B), 240–300 min (100% B–100% C), and 300–360 min (100% C). The rotation speed of the rotor was 900 rpm. Following that, all the remaining samples were recovered by elution of methanol at 50 mL/min. One gram of crude sample was dissolved in 20 mL of mixed upper and lower phases and subjected to the CPC system.

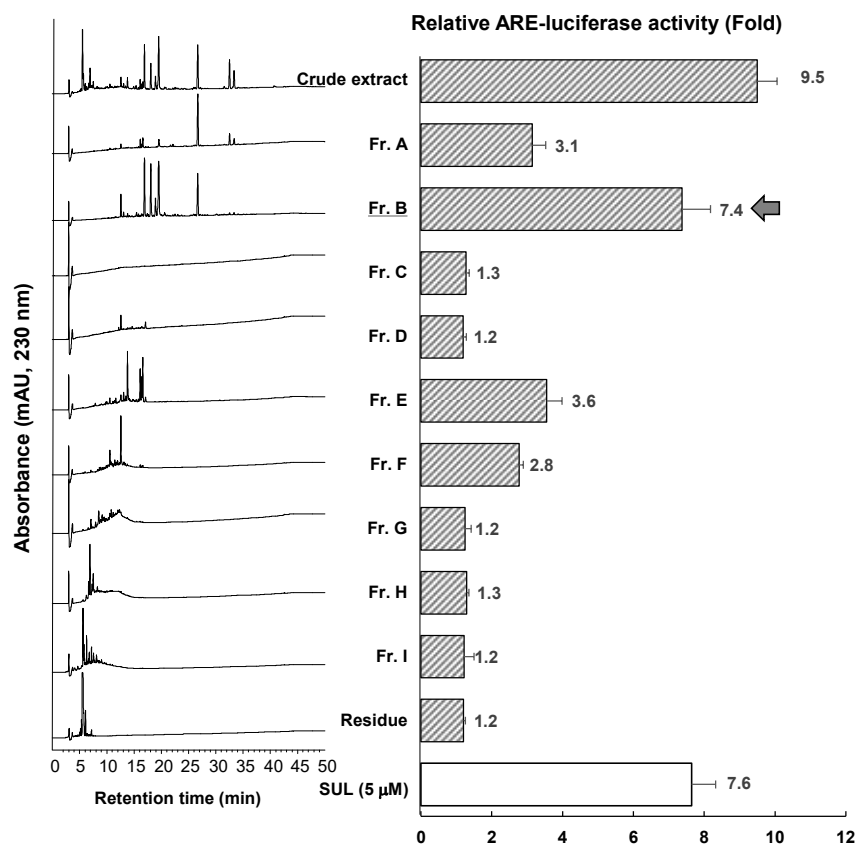

**Figure S3.** HPLC chromatograms and relative ARE-luciferase activity of CPC-fractions (A–R). Each CPC fraction was analyzed by HPLC, and its ARE induction activity was evaluated in ARE-HepG2 cells at concentration applied at each assigned weight ratio (based on 30 μg/ml CME). Data are presented as means ± S.E. (n = 3).

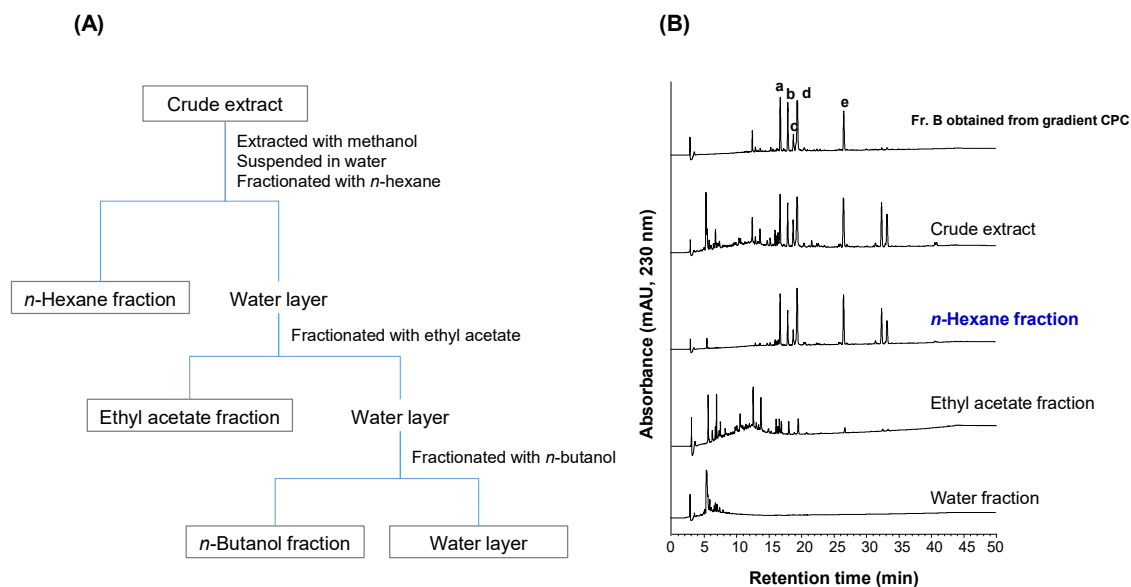

**Figure S4.** Comparison of solvent fraction and Fr. B obtained from gradient CPC. Scheme of solvent fractionation **(A)** and HPLC analysis of Fr. B (active fraction) and solvent extracts **(B)**. HPLC conditions are as follows; column: Capcellpak UG120 C18 column (4.6 × 250 mm, 5 μm, Shiseido, Tokyo, Japan), mobile phase: acetonitrile containing 0.1% formic acid **(A)** and water containing 0.1% formic acid **(B)**, gradient elution: 0–10 min, 10–50 % A; 10–45 min, 50–95% A; and 50 min, 95% A, column temperature: 40°C, mobile phase flow rate: 1 mL/min, the detection wavelength: 230 nm, and the injection volume: 10 μL.

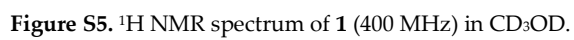

**Figure S5.**  $^1\text{H}$  NMR spectrum of **1** (400 MHz) in  $\text{CD}_3\text{OD}$ .

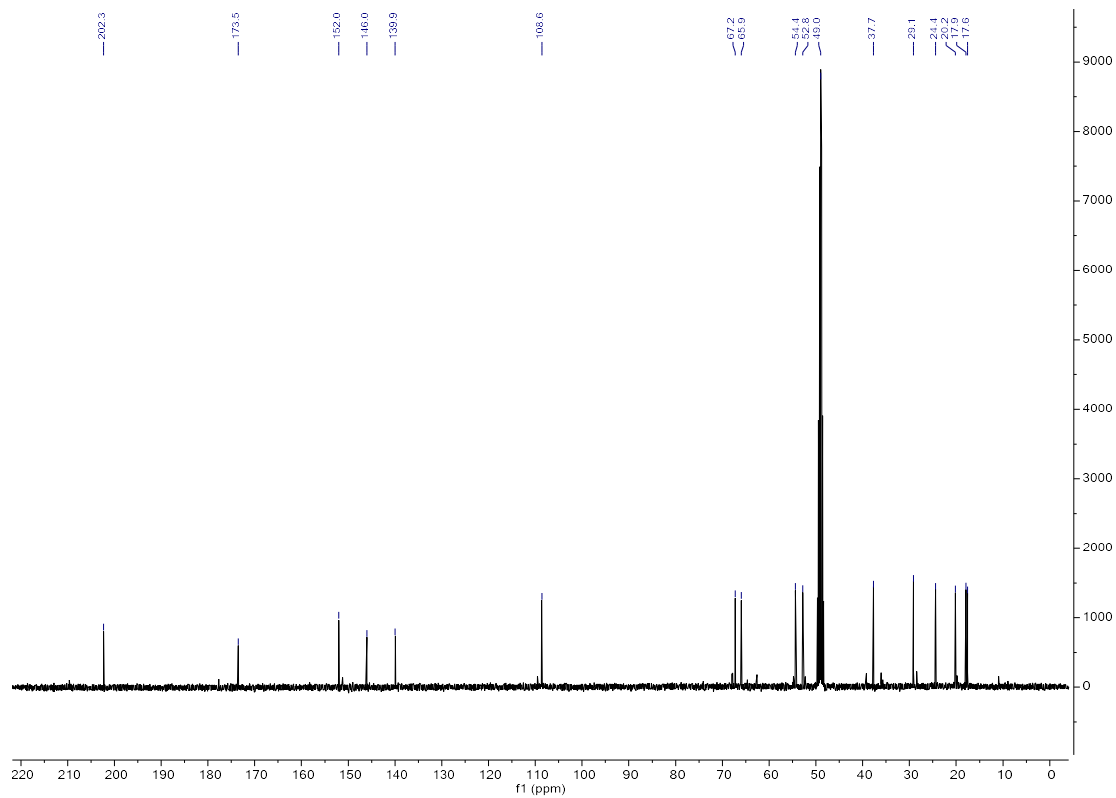

**Figure S6.** <sup>13</sup>C NMR spectrum of **1** (100 MHz) in CD<sub>3</sub>OD.

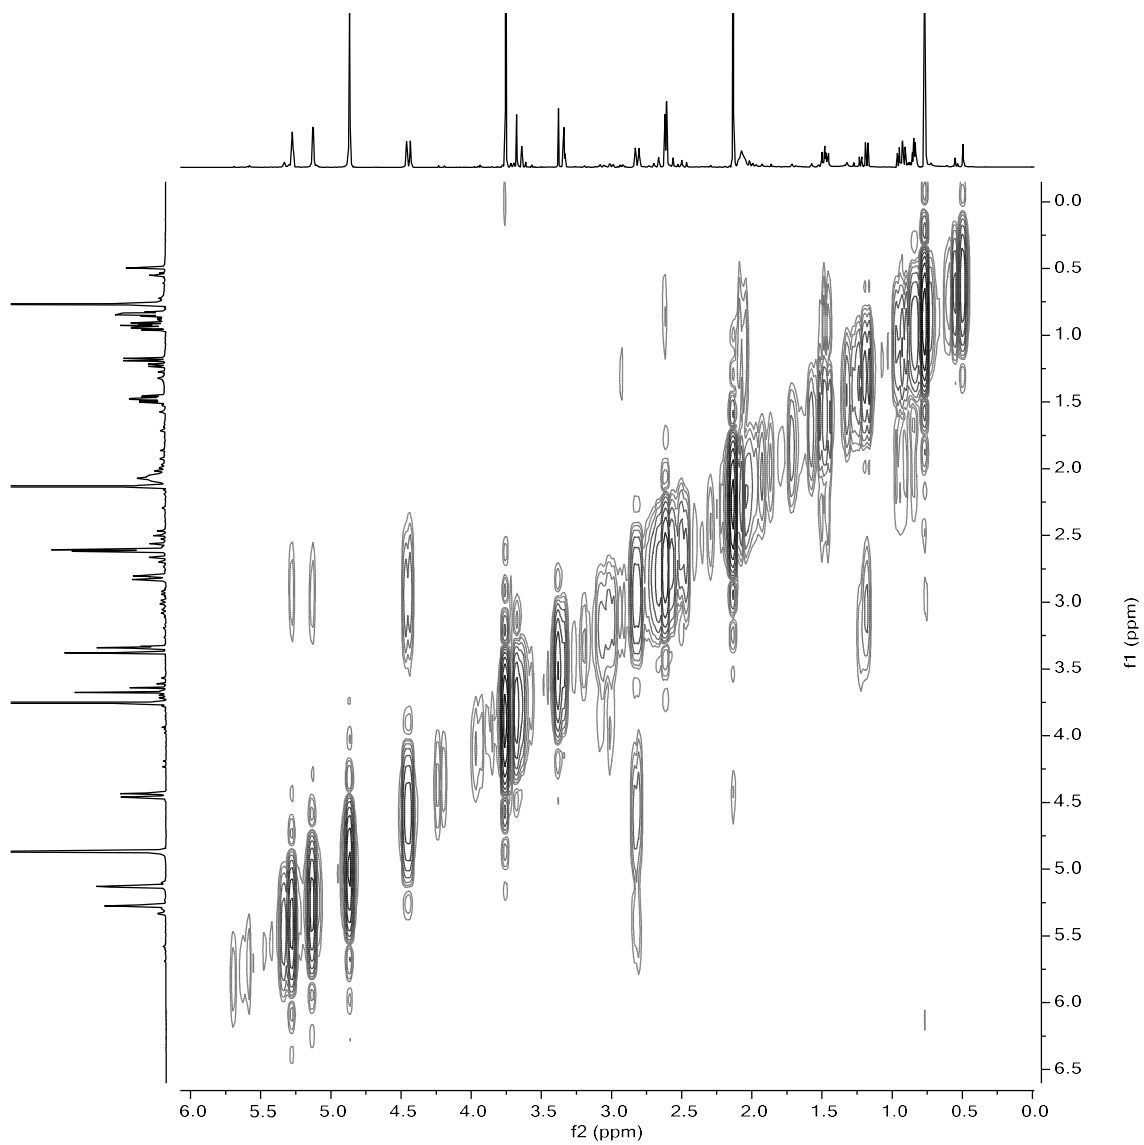

**Figure S7.**  $^1\text{H}$ - $^1\text{H}$  COSY spectrum of **1** in  $\text{CD}_3\text{OD}$ .

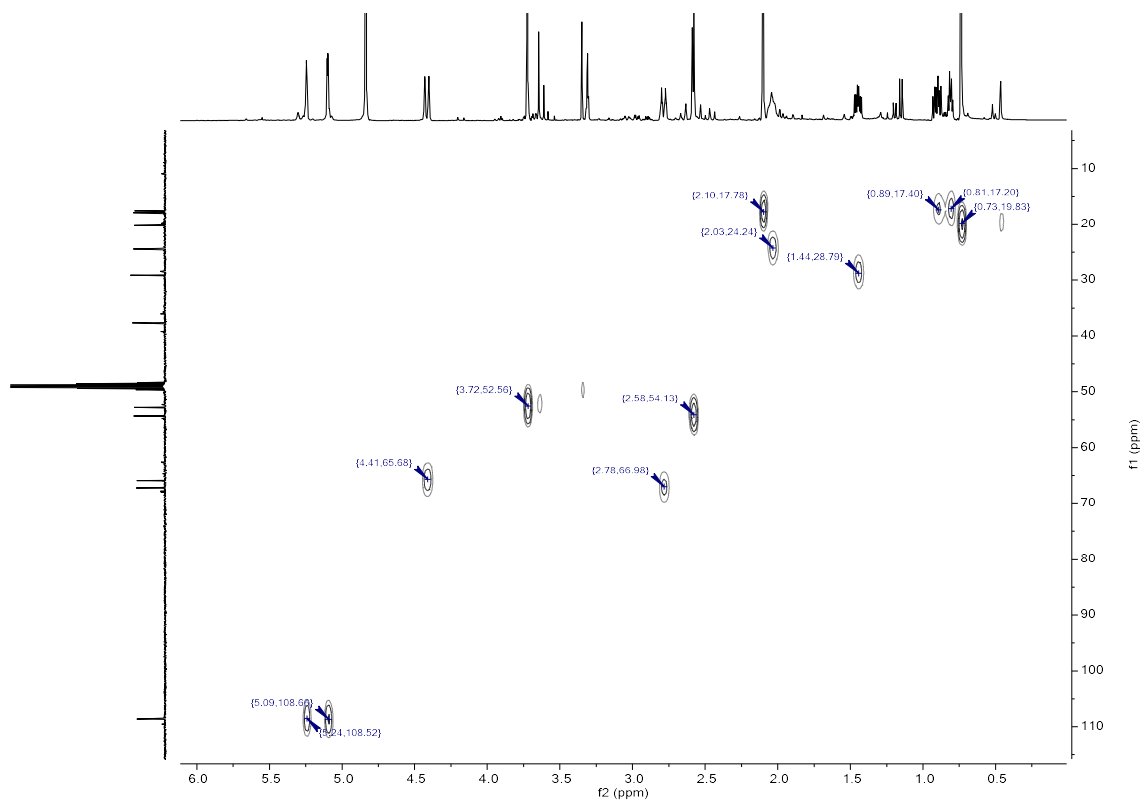

**Figure S8.** HSQC spectrum of **1** in CD<sub>3</sub>OD.



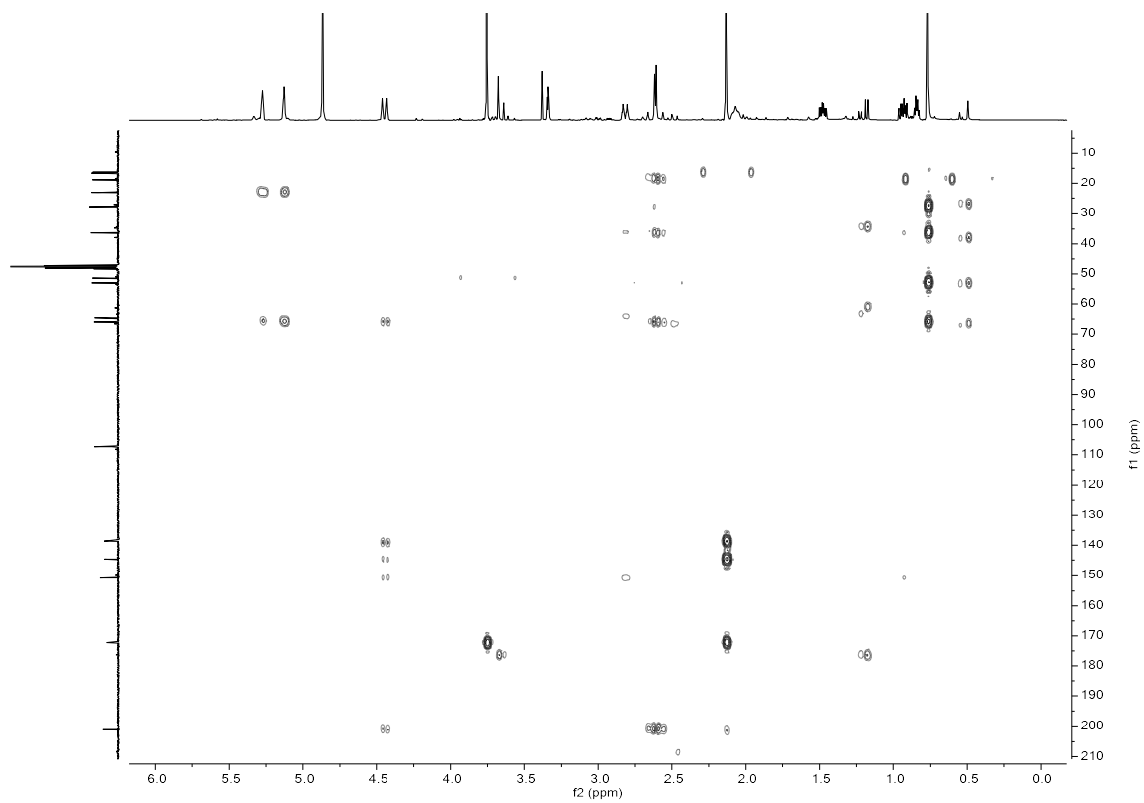

**Figure S9.** HMBC spectrum of **1** in CD<sub>3</sub>OD.

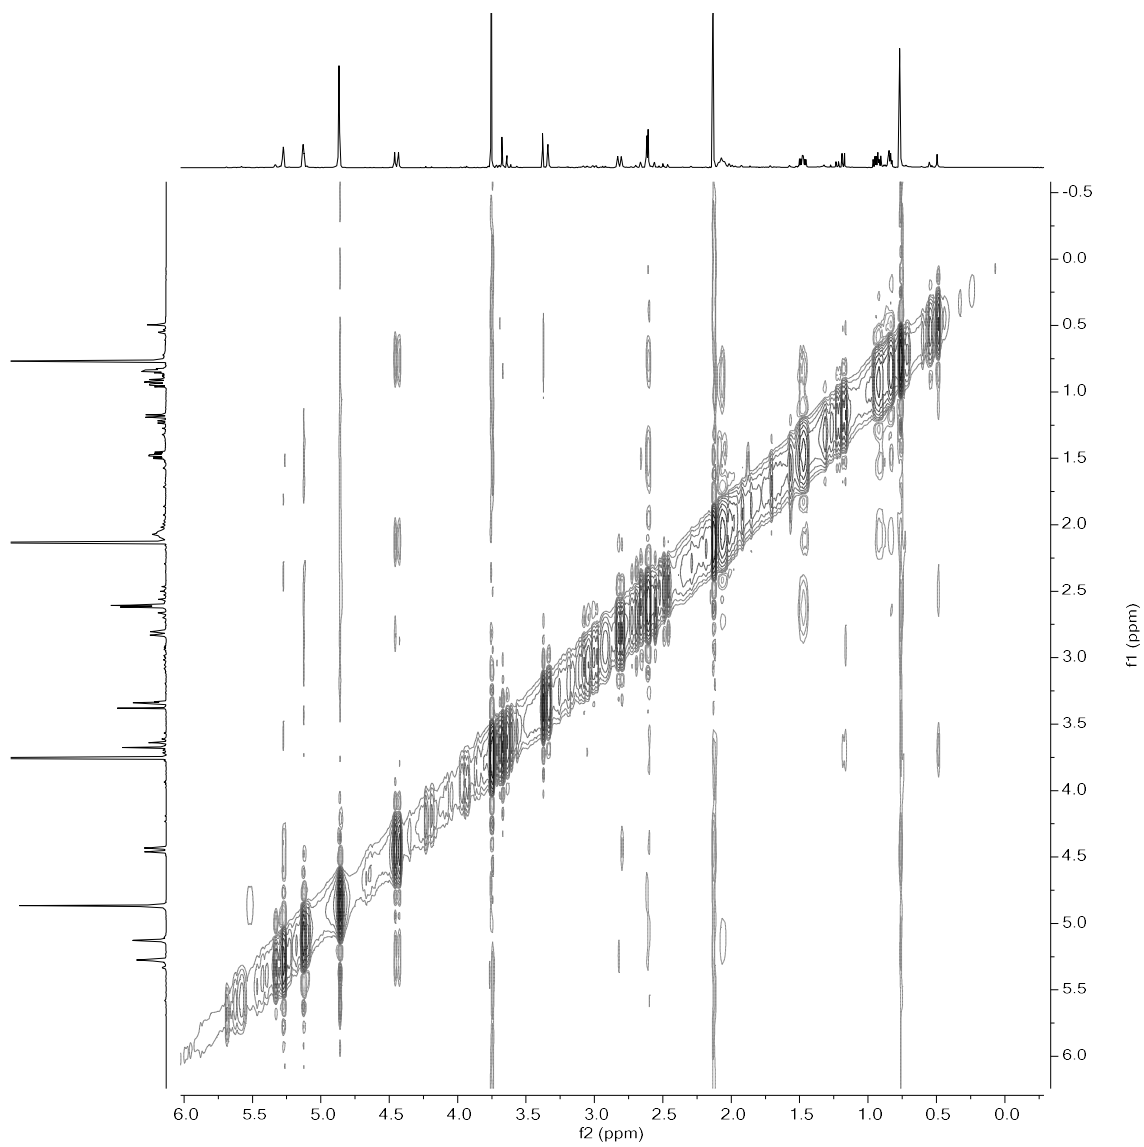

**Figure S10.** NOESY spectrum of **1** in CD<sub>3</sub>OD.

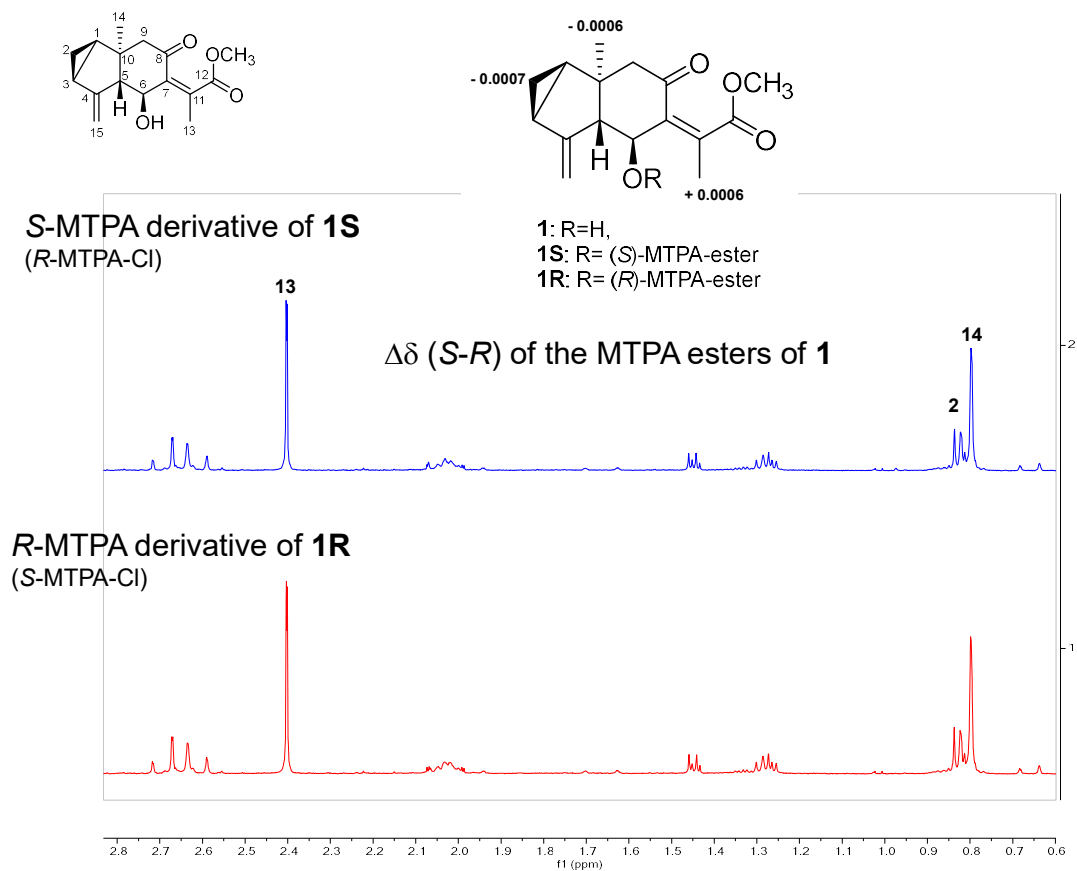

**Figure S11.**  $^1\text{H}$  NMR spectra of MTPA esters **1S** and **1R** and  $\Delta\delta$ (S-R) values for (S)- and (R)-MPTA esters (**1S** and **1R**).

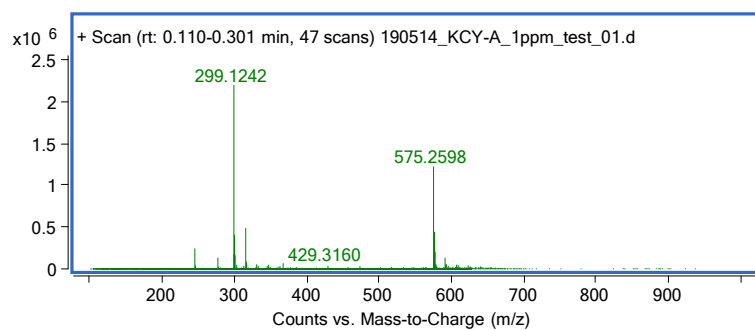

**Figure S12.** HRESI (qTOF) mass spectrum of **1**.

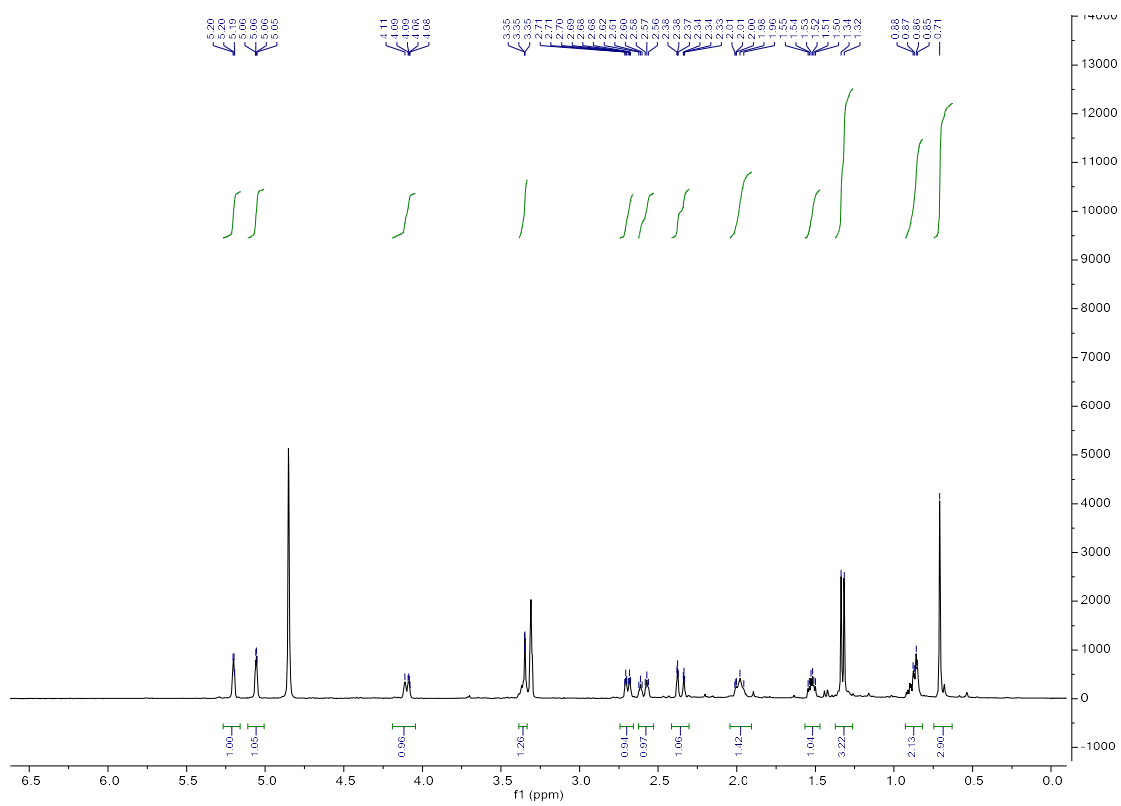

**Figure S13.** <sup>1</sup>H NMR spectrum of **2** (400 MHz) in CD<sub>3</sub>OD.

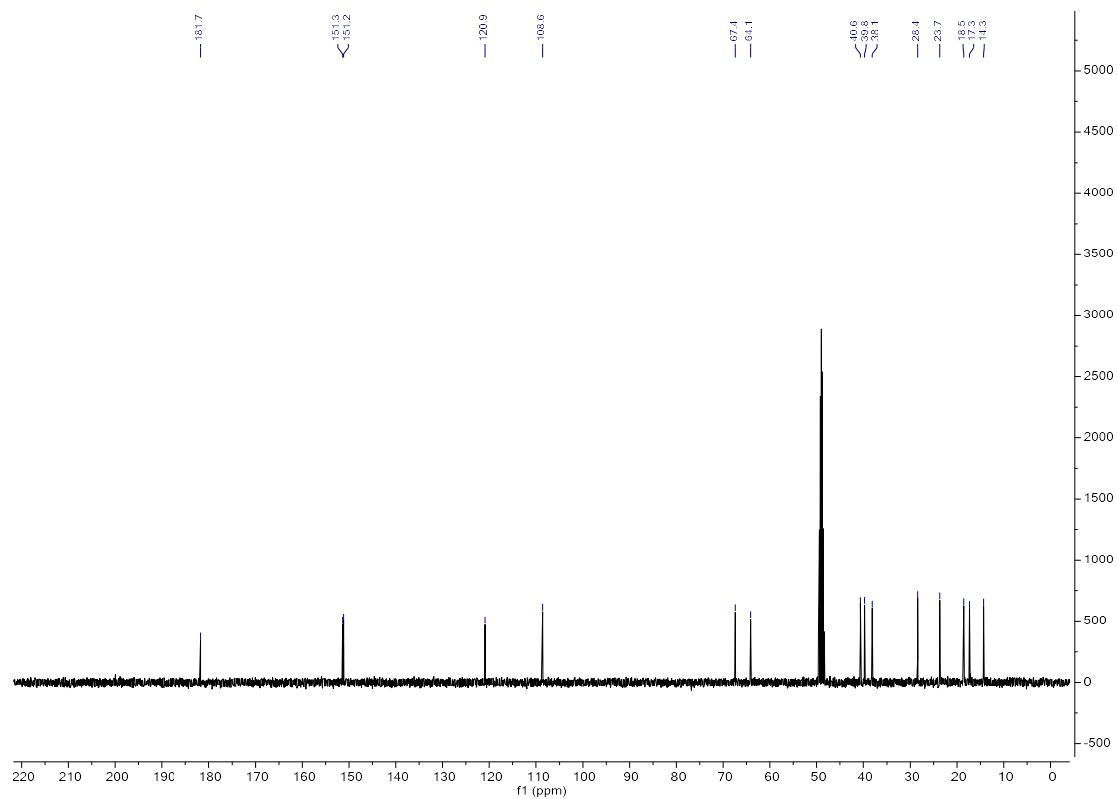

**Figure S14.** <sup>13</sup>C NMR spectrum of 2 (100 MHz) in CD<sub>3</sub>OD.

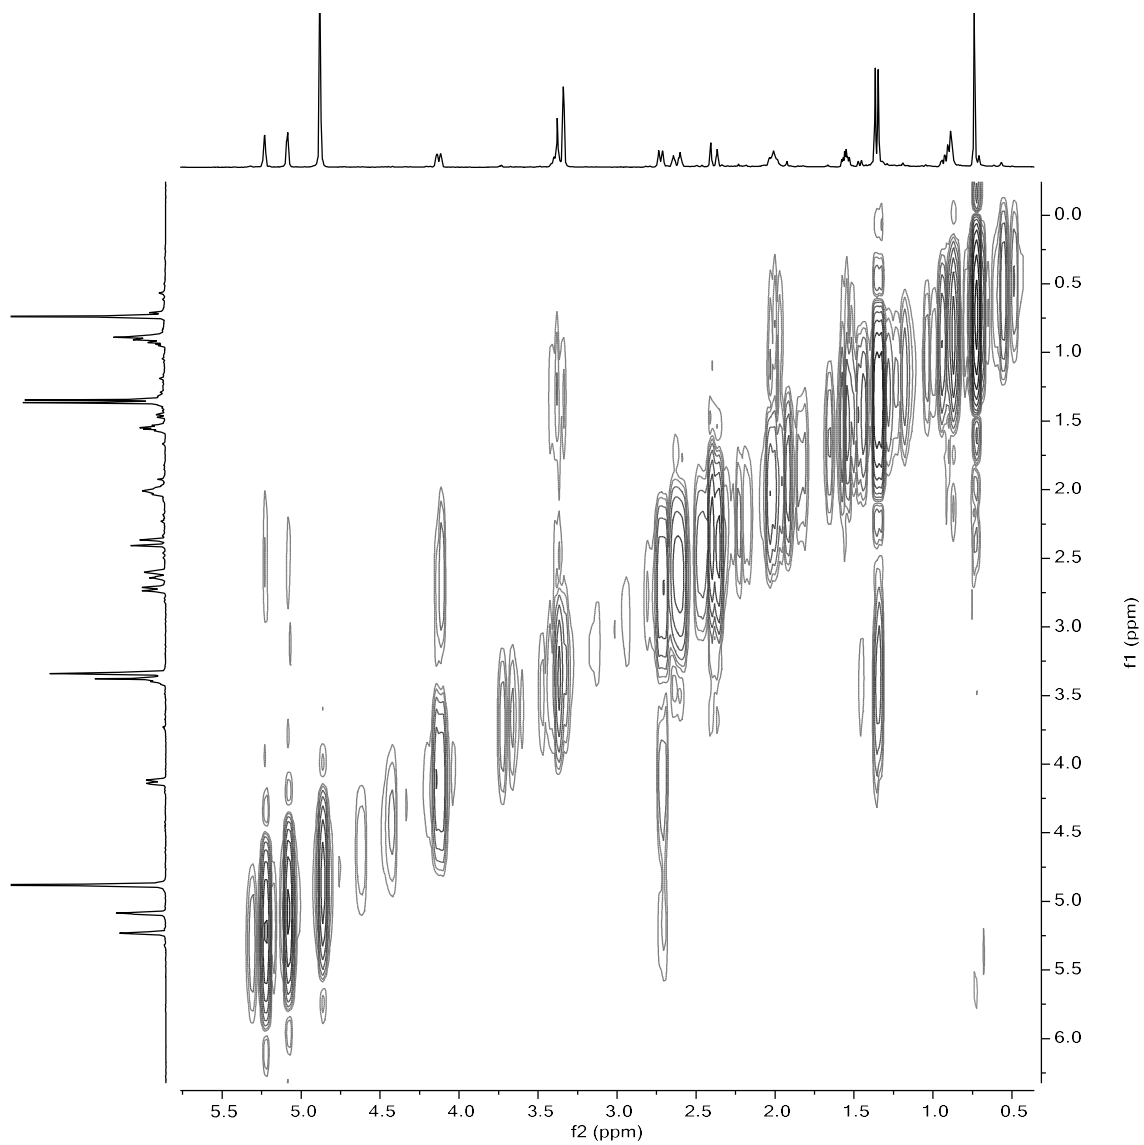

**Figure S15.**  $^1\text{H}$ - $^1\text{H}$  COSY spectrum of **2** in  $\text{CD}_3\text{OD}$ .

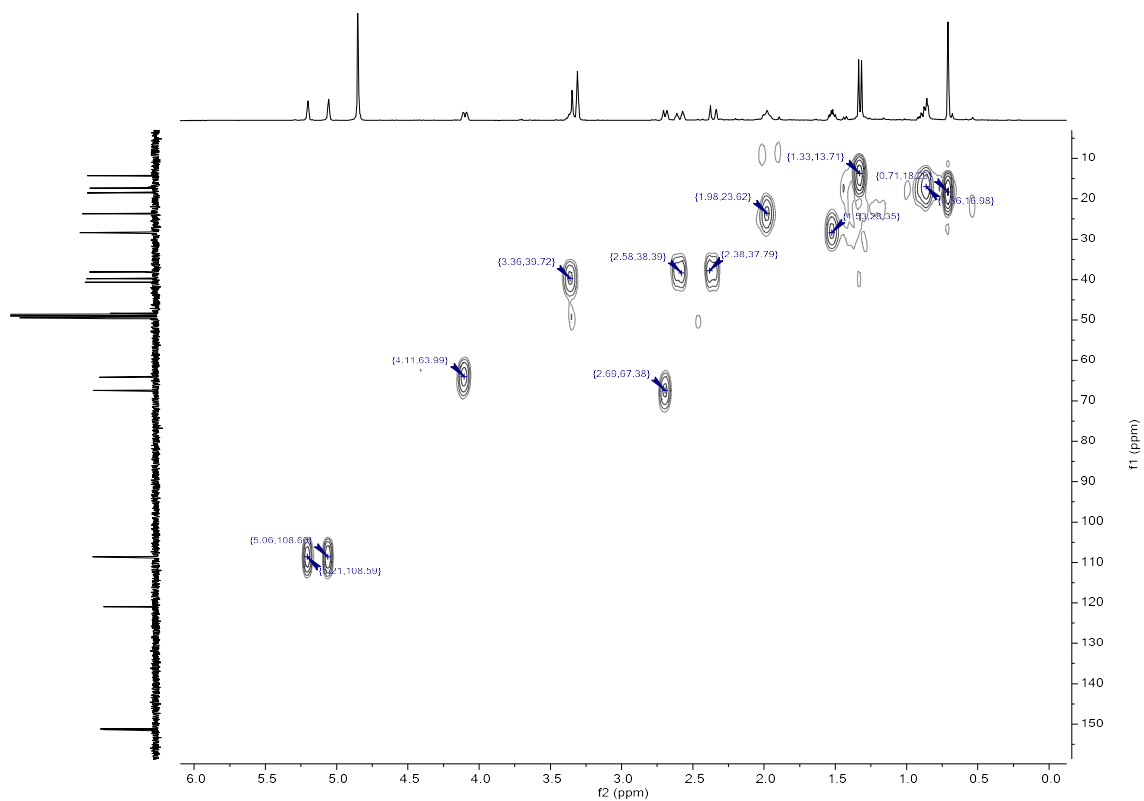

**Figure S16.** HSQC spectrum of **2** in CD<sub>3</sub>OD.

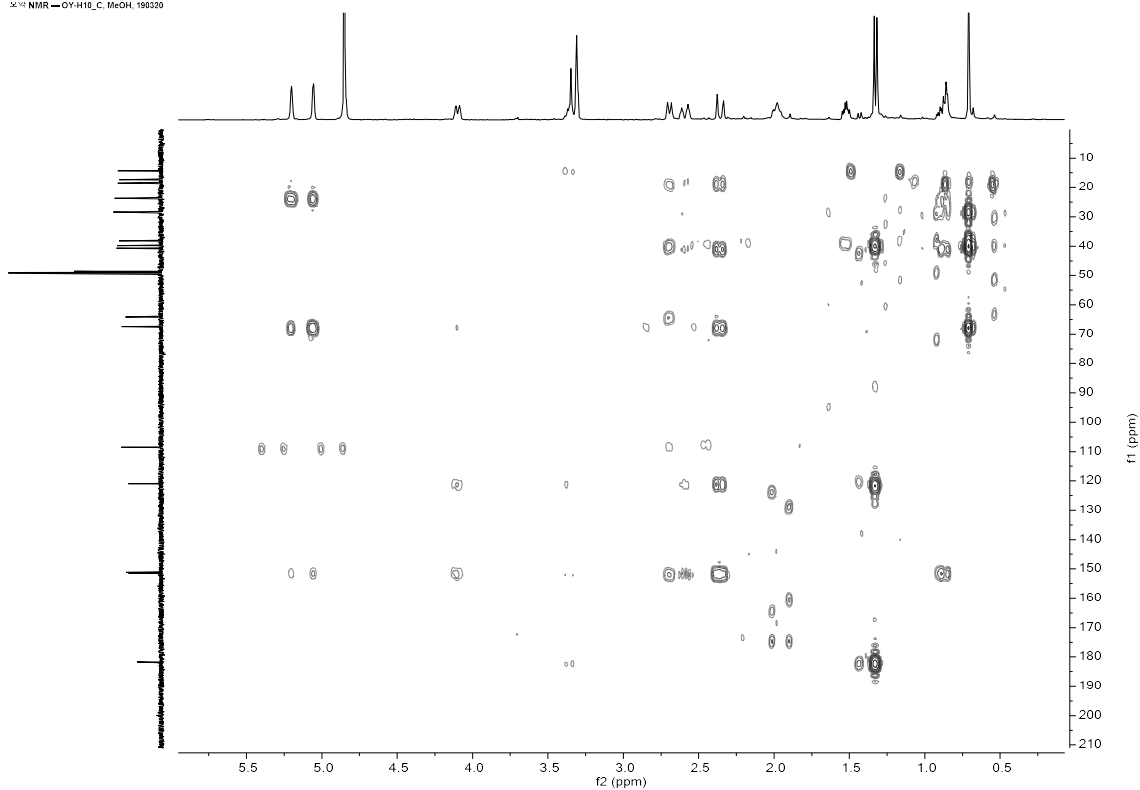

**Figure S17.** HMBC spectrum of **2** in CD<sub>3</sub>OD.



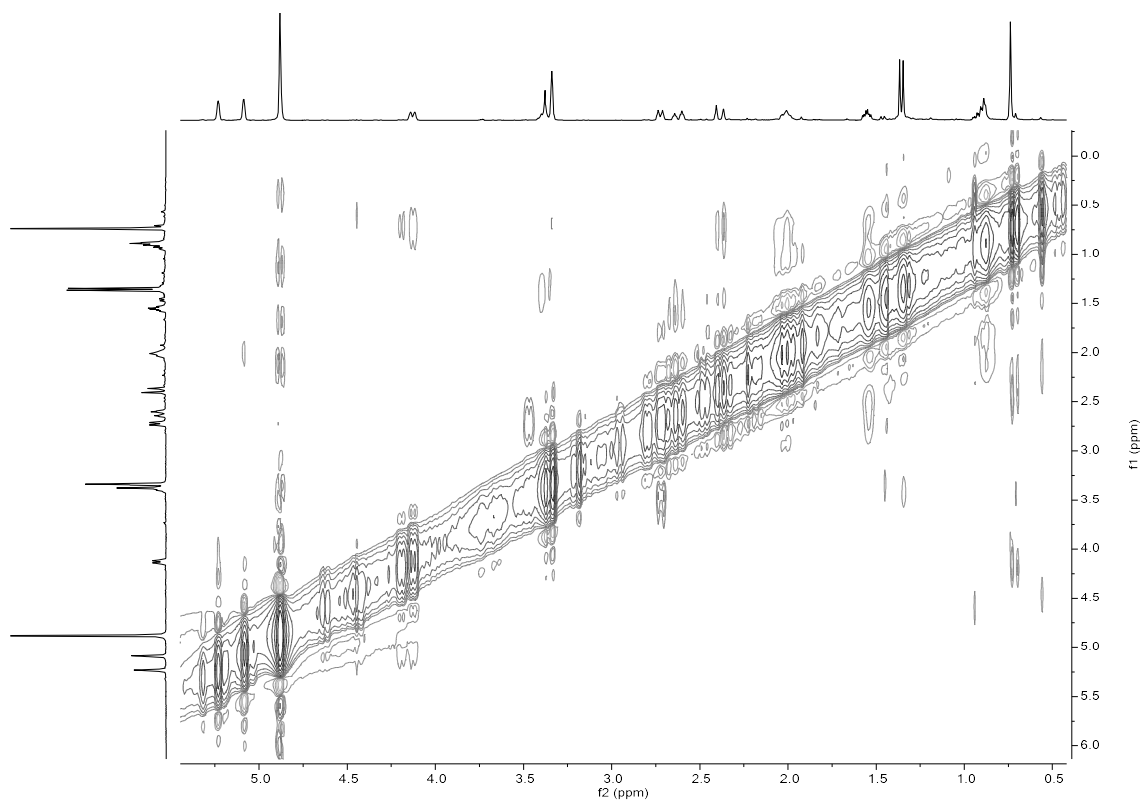

**Figure S18.** NEOSY spectrum of **2** in CD<sub>3</sub>OD.

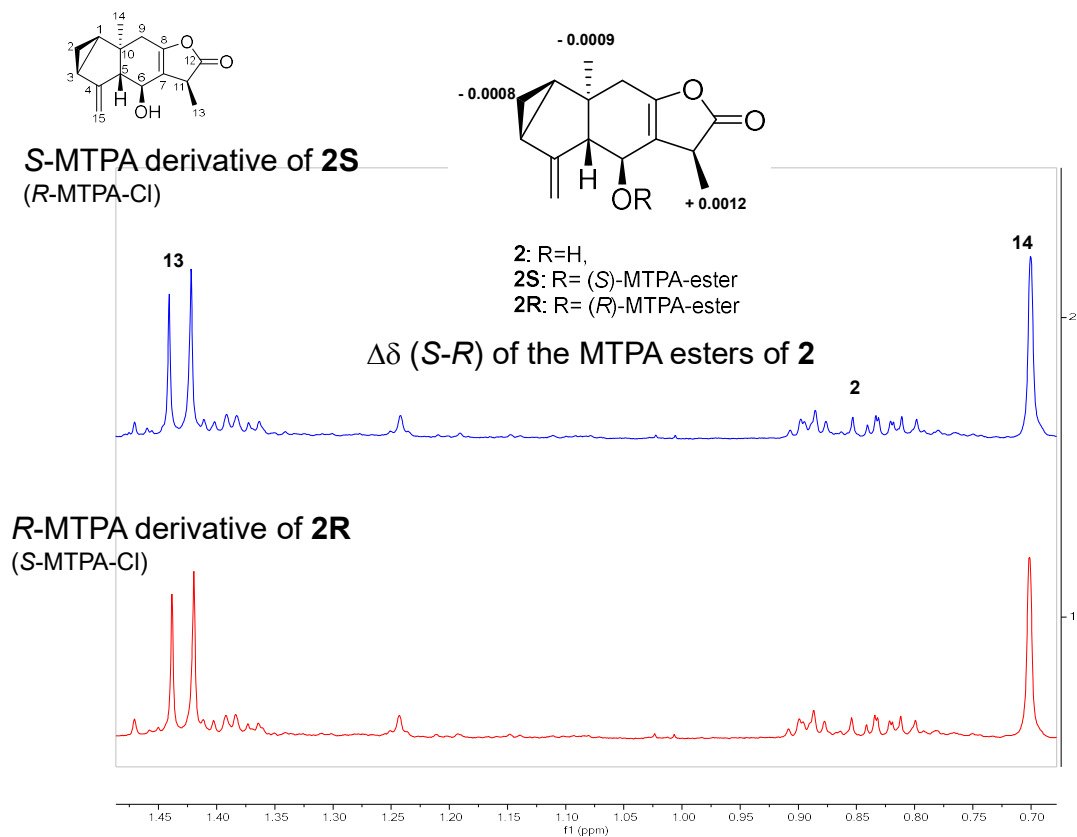

**Figure S19.**  $^1\text{H}$  NMR spectra of MTPA esters **2S** and **2R** and  $\Delta\delta$  (*S-R*) values for (*S*)- and (*R*)-MTPA esters (**2S** and **2R**).

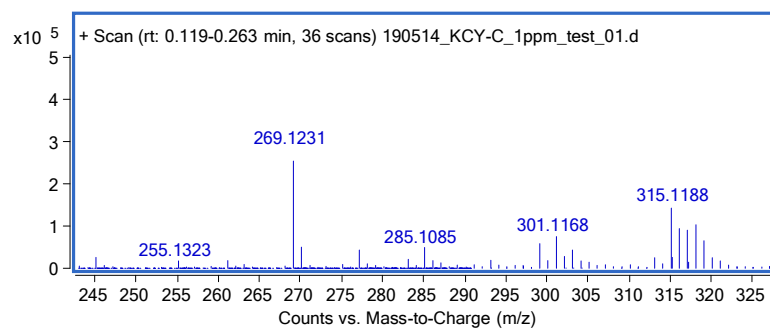

**Figure S20.** HRESI (qTOF) mass spectrum of **2**.
